# Supplementary material for: A Liquid Chromatography-Mass Spectrometry Method to Study the Interaction between Membrane Proteins and Low-Molecular-Weight Compound Mixtures
Source: Molecules. 2022 Jul 30;27(15):4889. doi: 10.3390/molecules27154889 (PMC9369908; doi:10.3390/molecules27154889)
Supplement: Supplementary file 1 [file molecules-27-04889-s001.zip › molecules-1840314-Supplementary Materials-Tables.xlsx]

## Sheet: TableS1
Ogiso et al., A liquid chromatography-mass spectrometry method to study the interaction between membrane proteins and low-molecular-weight compound mixtures
Supplemental Material
Table S1. Major membrane protein species in the MiaPaCa2-derived membrane protein fraction
Proteins in the MiaPaCa2-derived membrane protein fraction were comprehensively analyzed. The orange, light blue and green columns are classified as mitochondrial, plasma and ER (or Lysosome) membrane proteins, respectively.
Family	Member	Database	Accession	Score	Mass	Num. of matches	Num. of significant matches	Num. of sequences	Num. of significant sequences	emPAI	Description
4	1	SwissProt	ATPB_HUMAN	3576	56525	96	96	24	24	2.95	ATP synthase subunit beta, mitochondrial OS=Homo sapiens OX=9606 GN=ATP5F1B PE=1 SV=3
33	1	SwissProt	ADT2_HUMAN	1025	33063	43	43	15	15	3.02	ADP/ATP translocase 2 OS=Homo sapiens OX=9606 GN=SLC25A5 PE=1 SV=7
56	1	SwissProt	TFR1_HUMAN	698	85282	34	34	20	20	1.08	Transferrin receptor protein 1 OS=Homo sapiens OX=9606 GN=TFRC PE=1 SV=2
59	1	SwissProt	CALX_HUMAN	677	67990	25	25	13	13	0.81	Calnexin OS=Homo sapiens OX=9606 GN=CANX PE=1 SV=2
60	1	SwissProt	VDAC1_HUMAN	674	30870	27	27	10	10	1.7	Voltage-dependent anion-selective channel protein 1 OS=Homo sapiens OX=9606 GN=VDAC1 PE=1 SV=2
129	1	SwissProt	APMAP_HUMAN	371	46625	12	12	8	8	0.7	Adipocyte plasma membrane-associated protein OS=Homo sapiens OX=9606 GN=APMAP PE=1 SV=2
220	1	SwissProt	AT2A2_HUMAN	214	116365	11	11	9	9	0.27	Sarcoplasmic/endoplasmic reticulum calcium ATPase 2 OS=Homo sapiens OX=9606 GN=ATP2A2 PE=1 SV=1
248	1	SwissProt	AT1B3_HUMAN	191	31840	9	9	6	6	0.78	Sodium/potassium-transporting ATPase subunit beta-3 OS=Homo sapiens OX=9606 GN=ATP1B3 PE=1 SV=1
496	1	SwissProt	EGFR_HUMAN	84	137671	5	5	5	5	0.12	Epidermal growth factor receptor OS=Homo sapiens OX=9606 GN=EGFR PE=1 SV=2
533	1	SwissProt	RAI3_HUMAN	73	40631	3	3	1	1	0.08	Retinoic acid-induced protein 3 OS=Homo sapiens OX=9606 GN=GPRC5A PE=1 SV=2
812	1	SwissProt	EPHA2_HUMAN	34	109705	2	2	2	2	0.06	Ephrin type-A receptor 2 OS=Homo sapiens OX=9606 GN=EPHA2 PE=1 SV=2
1009	1	SwissProt	MBOA7_HUMAN	19	53426	1	1	1	1	0.06	Lysophospholipid acyltransferase 7 OS=Homo sapiens OX=9606 GN=MBOAT7 PE=1 SV=2
1047	1	SwissProt	GPR75_HUMAN	16	60422	1	1	1	1	0.05	Probable G-protein coupled receptor 75 OS=Homo sapiens OX=9606 GN=GPR75 PE=1 SV=1
1055	1	SwissProt	VATE1_HUMAN	16	26187	1	1	1	1	0.12	V-type proton ATPase subunit E 1 OS=Homo sapiens OX=9606 GN=ATP6V1E1 PE=1 SV=1
1074	1	SwissProt	TOM20_HUMAN	15	16462	1	1	1	1	0.2	Mitochondrial import receptor subunit TOM20 homolog OS=Homo sapiens OX=9606 GN=TOMM20 PE=1 SV=1
1082	1	SwissProt	TM9S3_HUMAN	14	68597	1	1	1	1	0.05	Transmembrane 9 superfamily member 3 OS=Homo sapiens OX=9606 GN=TM9SF3 PE=1 SV=2
											Mitochondria
											Plasma membrane
											ER or Lysosome
MS data file	MiaPaCam_211014_1-3_01_7276.mgf
Database	SwissProt 2019_10
Taxonomy	Homo sapiens (human) (20,380 sequences)
Timestamp	29 Oct 2021 at 09:45:52 GMT
Type of search	MS/MS Ion Search
Quantitation	None
Crosslinking	None
Enzyme	Trypsin
Fixed modifications	Carboxymethyl (C)
Variable modifications	Oxidation (M)
Mass values	Monoisotopic
Protein mass	Unrestricted
Peptide mass tolerance	0.02 Da
Fragment mass tolerance	0.02 Da
Max missed cleavages	2
Instrument type	ESI-QUAD-TOF
Number of queries	19911
Significance threshold p<	0.05
Max. number of families	AUTO
Ions score or expect cut-off	-1
Min. number of sig. unique sequences	1
Preferred taxonomy	All entries

## Sheet: TableS2
Ogiso et al., A liquid chromatography-mass spectrometry method to study the interaction between membrane proteins and low-molecular-weight compound mixtures
Supplemental Material
Table S2. Ingredient analysis of P.lactiflora
Peony ingredients were analyzed using Bruker LC-TOF/MS and MetaboScape software.
Data set : Shakuyaku_org_APCI_neg_20190122
m/z meas.	M meas.	RT [min]	ΔRT	Δm/z [mDa]	mSigma	MS/MS score	Include	Molecular Formula	Annotations	Ions	AQ	Boxplot	Flags	MS/MS	Name	Δm/z [ppm]	Annotation Source	Bl_1_OE_neg_ms1_1_01_1904	Bl_2_OE_neg_ms1_13_01_1905	Bl_3_OE_neg_ms1_25_01_1906	ShB_4_OE_neg_ms1_37_01_1907	ShB_5_OE_neg_ms1_49_01_1908	ShB_6_OE_neg_ms1_61_01_1909	ShH_7_OE_neg_ms1_73_01_1910	ShH_8_OE_neg_ms1_85_01_1911	ShH_9_OE_neg_ms1_97_01_1912	ShT_10_OE_neg_ms1_1_01_1913	ShT_11_OE_neg_ms1_13_01_1914	ShT_12_OE_neg_ms1_25_01_1915	ShB_4_OE_neg_autoMS_37_01_1916	ShB_5_OE_neg_autoMS_49_01_1917	ShB_6_OE_neg_autoMS_61_01_1918	ShH_7_OE_neg_autoMS_73_01_1919	ShH_8_OE_neg_autoMS_85_01_1920	ShH_9_OE_neg_autoMS_97_01_1921	ShT_10_OE_neg_autoMS_1_01_1922	ShT_11_OE_neg_autoMS_13_01_1923	ShT_12_OE_neg_autoMS_25_01_1924
341.109	342.117	2.21		0.313	0.7	0	TRUE	C12H22O11	SmartFormula - mzdev: 0.0003 mSigma: 0.73, , Analyte List - Shakuyaku_181114 (1)	[M-H]-, [M+HCOO]-	2020	5849087	[]	TRUE	Sucrose	0.918	Shakuyaku_181114 (1)	0	0	0	5849087	5849087	5849087	5849087	5849087	5849087	5849087	5849087	5849087	5849087	5849087	5826329	5849087	5849087	5844101	5849087	5849001	5849087
525.162	526.169	2.82		0.516	1.5	0	TRUE	C24H30O13	SmartFormula - mzdev: 0.0005 mSigma: 1.48, , Analyte List - Shakuyaku_Add_Clust181106 (1)	[M-H]-	2020	5844713	[]	TRUE	Paeoniflorin+HCOOH	0.983	Shakuyaku_Add_Clust181106 (1)	0	0	0	5844713	5845195	5836653	0	5849087	0	5848942	5848716	5849087	5791295	5798771	5845120	0	5846705	5847895	5848589	5844721	5840444
493.12	494.127	2.25		0.324	2	0	TRUE	C19H26O15	SmartFormula - mzdev: 0.0003 mSigma: 1.98, , Analyte List - Shakuyaku_181114 (1)	[M-H]-	2020	2267476	[BLUE]	TRUE	1'-O-galloylsucrose / 6'-O-galloylsucrose / 6-O-galloylsucrose	0.657	Shakuyaku_181114 (1)	0	0	0	3167826	3023648	3034392	959347	761177	848440	2398734	2547076	2416627	2774487	2836246	3127013	886398	279753	706510	2267476	2293115	2147991
388.118	389.125	2.2		-0.044	20.1		TRUE	C17H20N5O4P	SmartFormula - mzdev: -0.0000 mSigma: 20.08,	[M-H]-	2010	2046252	[]	FALSE		-0.114		0	0	0	2671352	2735523	2301094	2207783	1828409	1777493	2072647	2046252	2211283	2339315	2330828	3099475	1987767	1821923	1732348	2168414	1814990	1959191
526.165	527.172	2.82		0.037	9.9		TRUE	C18H25N9O10	SmartFormula - mzdev: 0.0000 mSigma: 9.90,	[M-H]-	2020	2529473	[]	FALSE		0.07		0	0	0	2588452	2610271	2342872	0	4162039	0	3284448	3022792	3845649	2152265	2294553	3710935	0	3079490	0	3075311	2805764	2529473
526.165	527.173	2.63		0.123	9.7		TRUE	C18H25N9O10	SmartFormula - mzdev: 0.0001 mSigma: 9.71,	[M-H]-	2020	1920260	[]	FALSE		0.234		0	0	0	2333694	2500964	1980374	4402673	3955519	3853349	0	0	0	1920260	2040981	0	3929019	3206578	3370708	0	0	0
449.146	450.153	2.84		0.428	1	0	TRUE	C22H26O10	SmartFormula - mzdev: 0.0004 mSigma: 0.98, , Analyte List - Shakuyaku_Add_Clust181106 (1)	[M-H]-, [M-H-H2O]-, [M+HCOO]-	2020	2094830	[]	TRUE	Paeoniflorin-CH2O	0.953	Shakuyaku_Add_Clust181106 (1)	0	0	0	2019313	2065344	1881992	2780614	2600349	2461928	2778980	2645960	3186233	1820535	1852132	2590160	2566550	2073123	2074292	2608620	2371745	2094830
357.119	358.127	2.84		0.408	1.3		TRUE	C16H22O9	SmartFormula - mzdev: 0.0004 mSigma: 1.26,	[M-H]-, [M-H-H2O]-, [M+HCOO]-	2020	1814409	[]	TRUE		1.142		0	0	0	1660257	1891919	1595371	2508126	2227978	1982447	2335785	2150571	2505532	1393399	1549518	2159120	1993478	1678519	1553781	2008164	1814409	1628877
169.014	170.022	2.24	-0.24	-0.013	0.5	0	TRUE	C7H6O5	SmartFormula - mzdev: -0.0000 mSigma: 0.54, , Analyte List - Shakuyaku_181114 (1), Spectral Library - Shakuyaku_seibun	[M-H]-	2220	940996	[]	TRUE	Gallic acid	-0.076	Shakuyaku_181114 (1)	0	0	0	1420845	1304142	1461745	1038121	915165	940996	1583881	1047760	1279253	928424	968977	1651284	778214	277964	563991	908931	843448	997350
479.156	480.164	2.83	-0.15	0.452	0.6	0	TRUE	C23H28O11	Analyte List - Shakuyaku_181114 (1), SmartFormula - mzdev: 0.0005 mSigma: 0.56,	[M-H]-, [M+Cl]-	2220	1345092	[]	TRUE	Paeoniflorin	0.943	Shakuyaku_181114 (1)	0	0	0	1188275	1200541	1092743	1857574	1782965	1582326	1544971	1446270	1835396	1000988	1079221	1606698	1550160	1365986	1317672	1464402	1345092	1203941
631.167	632.174	2.87		0.267	1.9	0	TRUE	C30H32O15	SmartFormula - mzdev: 0.0003 mSigma: 1.89, , Analyte List - Shakuyaku_181114 (1)	[M-H]-	2020	854187	[BLUE]	TRUE	Galloylpaeoniflorin / Galloylalbifrorin	0.423	Shakuyaku_181114 (1)	0	0	0	1139454	1184834	952298	178117	79178	0	1982849	1648675	1453863	854187	854031	3004266	93120	0	0	1542383	1330555	1164832
495.151	496.158	2.45		0.254	0.4	0	TRUE	C23H28O12	SmartFormula - mzdev: 0.0003 mSigma: 0.38, , Analyte List - Shakuyaku_Add_Clust181106 (1)	[M-H]-, [M+HCOO]-	2020	809485	[RED]	TRUE	Oxypaeoniflorin	0.512	Shakuyaku_Add_Clust181106 (1)	0	0	0	933215	919540	774089	1715699	1499707	1341818	365362	346488	341802	842730	809485	1349845	1575275	1201253	1308348	396218	305049	305845
327.109	328.116	2.84		0.343	17.1	0	TRUE	C15H20O8	SmartFormula - mzdev: 0.0003 mSigma: 17.10, , Analyte List - Shakuyaku_181114 (1)	[M-H]-, [M-H-H2O]-, [M+HCOO]-	2020	951101	[]	TRUE	Paeonoside	1.049	Shakuyaku_181114 (1)	0	0	0	872740	951101	827721	1304243	1205732	1085580	1238290	1156074	1330592	767012	817034	1138181	1108182	907793	883193	1112646	969725	898827
343.114	344.121	2.21		-1.15	36.7		TRUE	C7H20N8O6S	SmartFormula - mzdev: -0.0011 mSigma: 36.72,	[M-H]-	1010	495058	[]	TRUE		-3.351		0	0	0	616653	662324	543762	537512	438622	442717	512938	495058	543535	564890	569221	719384	483055	443045	434716	526787	444810	487775
377.086	378.093	2.19		0.161	12.5	0	TRUE	C12H23ClO11	Analyte List - Shakuyaku_Add_Clust181106 (1)	[M-H]-	2020	428656	[]	TRUE	[C12H22O11]+HCl / [Sucrose]+HCl	0.428	Shakuyaku_Add_Clust181106 (1)	0	0	0	579065	577182	474741	462992	401436	359750	465607	422113	451323	457658	463338	640624	407467	406182	359101	431869	358162	428656
629.187	630.195	4.22		-0.377	1.3	0	TRUE	C31H34O14	SmartFormula - mzdev: -0.0004 mSigma: 1.35, , Analyte List - Shakuyaku_Add_Clust181106 (1)	[M-H]-	2020	442361	[]	TRUE	Benzoylpaeoniflorin+HCOOH	-0.599	Shakuyaku_Add_Clust181106 (1)	0	0	0	566083	558684	473189	0	0	0	688887	656448	589015	442361	440874	964087	229600	33269	180457	675924	640431	511733
629.188	584.189	4.29	-0.19	0.002	0.3	0	TRUE	C30H32O12	SmartFormula - mzdev: 0.0000 mSigma: 0.32, , Analyte List - Shakuyaku_181114 (1)	[M+HCOO]-, [M-H]-	2220	442361	[BLUE]	TRUE	Benzoylpaeoniflorin	0.004	Shakuyaku_181114 (1)	0	0	0	566083	558684	473189	274084	220226	0	688887	656448	589015	442361	440874	964087	229600	187811	180457	675924	640431	511733
629.187	630.195	4.38		0.302	4.5	0	TRUE	C31H34O14	SmartFormula - mzdev: 0.0003 mSigma: 4.47, , Analyte List - Shakuyaku_Add_Clust181106 (1)	[M-H]-	2020	180457	[]	TRUE	Benzoylpaeoniflorin+HCOOH	0.48	Shakuyaku_Add_Clust181106 (1)	0	0	0	566083	558684	0	275615	220226	221264	0	0	589015	0	0	0	229600	187811	180457	0	640431	511733
331.068	332.075	2.27		0.473	3.2	0	TRUE	C13H16O10	SmartFormula - mzdev: 0.0005 mSigma: 3.18, , Analyte List - Shakuyaku_181114 (1)	[M-H]-	2020	309959	[]	TRUE	beta-Glucogallin	1.428	Shakuyaku_181114 (1)	0	0	0	433823	442868	379225	411906	338127	333236	307658	292976	283871	372581	381511	488095	368704	164571	309959	271548	236860	266010
433.115	434.122	2.8		0.508	1.6	0	TRUE	C21H22O10	Analyte List - Shakuyaku_181114 (1), SmartFormula - mzdev: 0.0005 mSigma: 1.56,	[M-H]-	2020	141487	[]	TRUE	Naringenin-5-O-beta-D-glucopyranoside / Naringenin-7-O-beta-D-glucopyranoside	1.173	Shakuyaku_181114 (1)	0	0	0	425297	433605	381778	234979	182254	181723	32780	32587	35805	336826	341813	533884	186347	128668	141487	28832	25919	24382
510.138	511.146	2.88		0.253	8.1		TRUE	C22H21N7O8	SmartFormula - mzdev: 0.0003 mSigma: 8.08,	[M-H]-, [M-H-H2O]-	2020	293378	[BLUE]	TRUE		0.497		0	0	0	418728	449627	349101	0	31106	0	721412	574632	493028	283712	293378	1039944	0	0	0	503591	437462	408721
287.056	288.063	2.25			∞		TRUE	C15H12O6	SmartFormula - mzdev: -0.0001 mSigma: Infinity, , Analyte List - arabidopsis180517, MetFrag	[M-H]-	MANUAL	368649	[]	TRUE	Okanin			0	0	0	416458	430591	374497	1720833	1458143	1412084	74979	66711	68595	352676	368649	497172	1353585	720331	1224397	56531	55286	60390
195.066	150.068	2.84		0.134	9.3	0	TRUE	C9H10O2	SmartFormula - mzdev: 0.0001 mSigma: 9.29, , Analyte List - arabidopsis180517	[M+HCOO]-, [M-H]-	2020	343235	[]	TRUE	p-Coumaryl alcohol	0.689	arabidopsis180517	0	0	0	377001	395728	343235	723230	620416	379031	478249	394221	596708	251692	288332	410938	347790	302999	283143	341453	301033	294619
300.999	302.007	2.26		0.252	2.5	0	TRUE	C14H6O8	Analyte List - HMDB_Plant_180619 (1), SmartFormula - mzdev: 0.0003 mSigma: 2.46,	[M-H]-	2020	214908	[]	TRUE	Ellagic acid	0.838	HMDB_Plant_180619 (1)	0	0	0	346888	323857	320993	469141	316115	345072	60722	44138	44146	222997	250727	272277	334844	30713	214908	30408	24956	40042
289.072	290.079	2.47	-0.03	0.243	0.9	0	TRUE	C15H14O6	SmartFormula - mzdev: 0.0002 mSigma: 0.89, , Spectral Library - Bruker MetaboBASE Personal Library, Analyte List - Shakuyaku_181114 (1)	[M-H]-	2220	276771	[RED]	TRUE	Catechin	0.84	Shakuyaku_181114 (1)	0	0	0	338652	323115	294339	1790396	1569764	1583483	120850	90885	97696	276771	275810	493061	1564375	1108802	1179602	99464	75747	65559
289.072	290.079	2.24	-0.26	-0.034	6.6	0	TRUE	C15H14O6	SmartFormula - mzdev: -0.0000 mSigma: 6.64, , Analyte List - Shakuyaku_181114 (1)	[M-H]-	2220	275553	[RED]	TRUE	Catechin	-0.118	Shakuyaku_181114 (1)	0	0	0	322255	309803	275553	1494394	1278744	1228076	95634	85445	89117	265227	277173	418590	1278400	756250	1066465	78753	72676	77128
169.014	170.021	2.45	-0.03	-0.104	0.8	0	TRUE	C7H6O5	Analyte List - Shakuyaku_181114 (1), SmartFormula - mzdev: -0.0001 mSigma: 0.79,	[M-H]-	2220	0	[]	TRUE	Gallic acid	-0.616	Shakuyaku_181114 (1)	0	0	0	292070	0	0	0	0	0	423186	280819	363912	0	0	0	0	119726	0	270680	216620	0
295.046	296.053	2.24		0.244	38.3		TRUE	C13H12O8	SmartFormula - mzdev: 0.0002 mSigma: 38.32,	[M-H]-	2010	194693	[BLUE]	TRUE		0.826		0	0	0	271730	267845	239448	143176	104053	105056	274367	231454	239341	194101	214874	290303	110502	29389	86128	204233	198972	194693
125.024	126.032	2.22		-0.039	2.4	0	TRUE	C6H6O3	SmartFormula - mzdev: -0.0000 mSigma: 2.45, , Analyte List - Shakuyaku_181114 (1)	[M-H]-	2020	202597	[RED]	FALSE	Pyrogallol	-0.314	Shakuyaku_181114 (1)	1191	836	0	253752	236347	275415	350556	326791	331442	239471	173373	202597	171294	188909	311075	280837	144977	228667	146419	129995	160210
125.024	126.032	2.25		0	1.5	0	TRUE	C6H6O3	Analyte List - Shakuyaku_181114 (1), SmartFormula - mzdev: -0.0000 mSigma: 1.52,	[M-H]-	2020	202597	[]	FALSE	Pyrogallol	0	Shakuyaku_181114 (1)	660	0	0	253752	236347	275415	350556	326791	331442	239471	173373	202597	171294	188909	311075	280837	144977	228667	146419	129995	160210
329.052	330.059	2.88		0.321	28		TRUE	C13H14O10	SmartFormula - mzdev: 0.0003 mSigma: 27.96,	[M-H]-	2010	153833	[BLUE]	TRUE		0.976		0	0	0	238172	260993	206168	40409	19022	13303	437342	314739	296239	142816	153833	556807	13773	5572	6215	267335	216074	222823
345.12	346.127	2.25		0.428	1.6	0	TRUE	C15H22O9	Analyte List - HMDB_Plant_180619 (1), SmartFormula - mzdev: 0.0004 mSigma: 1.65,	[M-H]-	2020	220306	[]	TRUE	Di-O-methylcrenatin	1.241	HMDB_Plant_180619 (1)	0	0	0	226533	236624	220306	316329	272201	257869	153543	160617	172455	212802	225488	278065	302541	288249	281888	177967	157841	152076
341.203	342.211	2.2		-0.881	18.4		TRUE	C12H30N4O7	SmartFormula - mzdev: -0.0009 mSigma: 18.35,	[M-H]-	2020	189789	[]	FALSE		-2.582		0	0	0	223373	233500	205580	206597	179471	176093	189789	188467	203720	213840	210626	261579	194928	178435	177884	198701	172998	187114
341.271	342.278	2.2					TRUE			[M-H]-		184299	[]	FALSE				0	0	0	218160	223119	200874	195531	172187	168638	190359	183181	197556	203653	206393	250074	184299	172034	168210	192993	170931	181688
179.056	180.063	2.2		0.032	8.3	0	TRUE	C6H12O6	SmartFormula - mzdev: 0.0000 mSigma: 8.28, , Analyte List - Shakuyaku_181114 (1)	[M-H]-	2020	178023	[]	FALSE	D-Glucose / D-Galactose / Fructose / myo-Inositol	0.18	Shakuyaku_181114 (1)	0	0	0	204640	212137	197873	190022	176222	169732	212179	176380	198877	180149	181632	258516	171655	164454	150164	185169	154463	178023
387.287	388.294	2.2		1.605	43.1		TRUE	C14H41N6O4P	SmartFormula - mzdev: 0.0016 mSigma: 43.12,	[M-H]-	1010	161018	[]	FALSE		4.145		0	0	0	190999	193279	174309	168527	151318	149740	166635	161018	171529	174995	177273	215842	157909	149188	146670	169425	150551	158393
405.141	360.142	2.32		0.48	23	0	TRUE	C16H24O9	SmartFormula - mzdev: 0.0002 mSigma: 21.04, , Analyte List - Shakuyaku_181114 (1)	[M+HCOO]-, [M-H]-	2010	154884	[]	TRUE	1-O-beta-D-glucopyranosylpaeonisuffrone	1.184	Shakuyaku_181114 (1)	0	0	0	189712	190075	180240	189802	154884	154569	78798	82328	85184	168412	172949	238739	187292	166589	168113	88049	74830	70495
387.215	388.222	2.2		-0.428	34.7		TRUE	C16H37O8P	SmartFormula - mzdev: -0.0004 mSigma: 34.65,	[M-H]-	2010	165239	[]	FALSE		-1.106		0	0	0	187182	187185	171950	175909	158177	154171	168368	159428	165470	171816	177480	217135	165239	151893	151728	167364	150819	157779
178.063	179.07	2.85		0.491	12.6		TRUE	C8H9N3O2	SmartFormula - mzdev: 0.0005 mSigma: 12.62,	[M-H]-	2020	164737	[]	TRUE		2.756		0	0	0	182347	183505	164737	344258	276631	177777	228889	190310	324042	110635	141596	198455	165395	140888	130572	163671	143461	139480
421.136	376.137	2.25		0.371	2.7	0	TRUE	C16H24O10	SmartFormula - mzdev: 0.0004 mSigma: 2.70, , Analyte List - Shakuyaku_181114 (1), MetFrag	[M+HCOO]-, [M-H]-	2020	166975	[RED]	TRUE	Desbenzoylpaeoniflorin	0.88	Shakuyaku_181114 (1)	0	0	0	181987	189704	165061	338861	286560	292121	135249	139607	141837	166975	173431	219409	317501	301330	304032	139541	128586	123367
321.026	322.033	2.26		0.338	2.9		TRUE	C14H10O9	SmartFormula - mzdev: 0.0003 mSigma: 2.93,	[M-H]-	2020	84154	[BLUE]	TRUE		1.052		0	0	0	176195	184029	163619	79062	55193	64346	143202	123725	129740	129768	148689	146954	67254	0	45305	84154	77810	107647
345.119	346.127	2.84		0.399	1.4	0	TRUE	C15H22O9	SmartFormula - mzdev: 0.0004 mSigma: 1.39, , Analyte List - HMDB_Plant_180619 (1)	[M-H]-, [M+HCOO]-	2020	185949	[]	TRUE	Di-O-methylcrenatin	1.155	HMDB_Plant_180619 (1)	0	0	0	171702	185949	167167	257434	234983	201328	250265	222622	251546	140966	160647	213289	201025	170402	165612	207053	191251	167671
507.151	462.153	2.83		0.468	2.1	0	TRUE	C23H26O10	Analyte List - Shakuyaku_181114 (1), SmartFormula - mzdev: 0.0005 mSigma: 2.11,	[M+HCOO]-, [M-H]-	2020	186470	[]	TRUE	Lactiflorin	0.922	Shakuyaku_181114 (1)	0	0	0	171505	175369	153974	223427	208699	204232	239494	224148	252359	154203	156848	216837	230156	185869	186470	221375	204058	184709
527.141	528.148	2.28		0.31	14.8	0	TRUE	C23H28O14	SmartFormula - mzdev: 0.0003 mSigma: 11.28, , Analyte List - Shakuyaku_181114 (1)	[M-H]-	2020	100136	[]	TRUE	Galloyldesbenzoylpaeoniflorin	0.588	Shakuyaku_181114 (1)	0	0	0	165279	158877	159951	109058	100187	100136	100779	94757	97950	148485	154960	159299	107100	44511	90654	97245	88610	84167
341.167	684.349	2.2					TRUE			[M-H-H]2-		115439	[]	FALSE				0	0	0	157534	174790	129745	128268	93997	94820	117795	109928	128252	136512	144702	231248	115439	89557	82978	117494	90166	99881
341.526	342.533	2.2					TRUE			[M-H]-		128790	[]	FALSE				0	0	0	156490	155882	142585	136015	118262	115987	134902	127976	142863	140807	148135	181466	128790	117219	111724	137649	120710	126711
168.006	169.014	2.26		1.344	∞		TRUE	C5H3N3O4	SmartFormula - mzdev: 0.0013 mSigma: Infinity,	[M-H]-	1000	87581	[BLUE]	FALSE		8.002		0	0	0	155505	162466	212914	0	0	0	177407	128812	133928	114618	131065	0	0	0	0	103619	87581	134337
165.056	166.063	2.84		0.072	7.9	0	TRUE	C9H10O3	SmartFormula - mzdev: 0.0001 mSigma: 7.91, , Analyte List - Shakuyaku_181114 (1)	[M-H]-	2020	159542	[]	TRUE	Paeonol / 4-Hydroxy-3-methoxyacetophenone	0.433	Shakuyaku_181114 (1)	0	0	0	152556	176073	157245	260913	242291	185631	220714	197150	246982	127057	146354	197724	175052	150441	140368	185215	159542	144667
271.061	272.069	4.58		0.038	2.2	0	TRUE	C15H12O5	SmartFormula - mzdev: 0.0000 mSigma: 2.22, , Analyte List - arabidopsis180517, Spectral Library - Bruker MetaboBASE Personal Library	[M-H]-	2020	64521	[]	TRUE	Naringenin	0.138	arabidopsis180517	0	0	0	147006	169169	144532	91431	74551	0	63825	63087	0	120400	130603	206498	64521	0	59641	72101	66356	49160
271.061	272.069	4.66		0.157	1	0	TRUE	C15H12O5	Spectral Library - Bruker MetaboBASE Personal Library, SmartFormula - mzdev: 0.0002 mSigma: 1.03, , Analyte List - arabidopsis180517	[M-H]-	2020	66356	[]	TRUE	Naringenin	0.578	arabidopsis180517	0	0	0	147006	169169	144532	91431	74551	57553	63825	63087	67065	120400	130603	206498	64521	61083	59641	72101	66356	49160
168.006	169.014	2.46		1.31	∞		TRUE	C5H3N3O4	SmartFormula - mzdev: 0.0013 mSigma: Infinity,	[M-H]-	1000	120723	[]	TRUE		7.799		0	0	0	141751	125913	0	161366	165350	147729	234178	158999	197185	110500	120723	257202	113359	64101	79787	159714	114826	104576
175.04	194.058	2.84		-0.106	∞	0	TRUE	C10H10O4	SmartFormula - mzdev: -0.0001 mSigma: Infinity, , Analyte List - arabidopsis180517	[M-H-H2O]-, [M-H]-	2000	131625	[]	TRUE	Ferulic acid	-0.603	arabidopsis180517	1057	1256	817	139036	141150	126672	252243	209346	135605	181209	143871	255084	97614	122507	159860	131625	119422	110362	135791	118013	114258
175.04	176.047	2.88		-0.147	∞		TRUE	C10H8O3	SmartFormula - mzdev: -0.0001 mSigma: Infinity,	[M-H]-	2000	131625	[]	TRUE		-0.839		1057	1256	817	139036	141150	126672	252243	209346	135605	181209	143871	255084	97614	122507	159860	131625	119422	110362	135791	118013	114258
341.293	684.6	2.2					TRUE			[M-H-H]2-		124070	[]	FALSE				0	0	0	138750	153130	129322	127989	116856	114555	124070	126845	126886	138558	132123	179006	121519	119858	116059	129322	113630	121822
341.293	342.3	2.2					TRUE			[M-H]-		124070	[]	FALSE				0	0	0	138750	153130	129322	127989	116856	114555	124070	126845	126886	138558	132123	179006	121519	119858	116059	129322	113630	121822
245.046	246.053	2.21			∞		TRUE	C13H10O5	SmartFormula - mzdev: 0.0001 mSigma: 41.49, , CompoundCrawler	[M-H]-	MANUAL	100445	[RED]	TRUE	2,3',4,6-tetrahydroxybenzophenone			0	0	0	137467	138128	123510	428135	362926	349351	58056	39736	48063	92905	100445	161953	349260	126373	234217	33446	31639	36395
525.363	526.37	2.83		0.521	23.3		TRUE	C17H47N14O3P	SmartFormula - mzdev: 0.0005 mSigma: 23.34,	[M-H]-	2010	127603	[]	FALSE		0.991		0	0	0	133970	135105	126683	0	190256	0	161542	150495	182009	122135	127603	175990	0	0	0	152824	142575	132927
341.229	684.472	2.2					TRUE			[M-H-H]2-		121754	[]	FALSE				0	0	0	133104	134342	125513	128215	118230	117826	124030	121754	127907	130263	129517	145482	124494	112873	113540	121481	114505	117394
341.229	342.236	2.21		0.91	14.9		TRUE	C11H26N12O	SmartFormula - mzdev: 0.0009 mSigma: 14.87,	[M-H]-	2020	121754	[]	FALSE		2.666		0	0	0	133104	134342	125513	128215	118230	117826	124030	121754	127907	130263	129517	145482	124494	112873	113540	121481	114505	117394
461.145	462.153	4.22		0.001	1.8	0	TRUE	C23H26O10	Analyte List - Shakuyaku_181114 (1), SmartFormula - mzdev: 0.0000 mSigma: 1.78,	[M-H]-, [M+HCOO]-	2020	103419	[]	TRUE	Lactiflorin	0.002	Shakuyaku_181114 (1)	0	0	0	131229	132455	107638	0	0	0	154150	149340	133212	103419	102997	220076	54214	0	39339	154032	146141	112139
461.145	462.153	4.29		0.148	1.2	0	TRUE	C23H26O10	Analyte List - Shakuyaku_181114 (1), SmartFormula - mzdev: 0.0001 mSigma: 1.24,	[M-H]-, [M+HCOO]-	2020	103419	[BLUE]	TRUE	Lactiflorin	0.321	Shakuyaku_181114 (1)	0	0	0	131229	132455	107638	63560	49350	49580	154150	149340	133212	103419	102997	220076	54214	38873	39339	154032	146141	112139
525.278	526.285	2.82		0.267	21.8		TRUE	C19H30N18O	SmartFormula - mzdev: 0.0003 mSigma: 21.80,	[M-H]-	2010	129090	[]	FALSE		0.507		0	0	0	130089	129090	126001	186070	183728	163583	153236	146637	180096	121338	127271	172157	0	0	0	146707	138683	128603
387.31	388.317	2.2					TRUE			[M-H]-		111613	[]	FALSE				0	0	0	129758	126147	121523	111687	107133	102248	117574	111613	114268	123135	118065	138979	107429	104052	103850	115080	102774	110535
387.559	388.566	2.2					TRUE			[M-H]-		106365	[]	FALSE				0	0	0	127925	133619	113641	113567	92615	94534	108280	106365	117378	117624	123837	150969	104690	94092	90243	113642	94602	103214
511.146	512.153	2.3		-0.121	25		TRUE	C26H29N2O5PS	SmartFormula - mzdev: -0.0001 mSigma: 24.97,	[M-H]-	2010	53250	[]	TRUE		-0.238		0	0	0	127019	114706	135780	53250	49344	49030	55407	54782	56912	111891	103289	155821	48122	27074	45886	58581	51516	48989
525.362	526.369	2.61		0.165	44.8		TRUE	C17H47N14O3P	SmartFormula - mzdev: 0.0002 mSigma: 44.81,	[M-H]-	2010	76804	[]	FALSE		0.314		0	0	0	124876	126999	112639	199313	0	178663	0	0	0	112628	115999	0	176935	155435	160836	0	0	76804
509.167	510.174	3.35		0.103	2.2	0	TRUE	C24H30O12	Analyte List - Shakuyaku_Add_Clust181106 (1), SmartFormula - mzdev: 0.0001 mSigma: 2.16,	[M-H]-	2020	110381	[BLUE]	TRUE	Paeoniflorin+CH2O	0.202	Shakuyaku_Add_Clust181106 (1)	0	0	0	122127	126662	110381	91108	74940	71527	163639	164904	164109	107215	115072	213168	80734	57959	60208	161343	141008	131500
509.167	510.174	3.41		0.526	3.4	0	TRUE	C24H30O12	SmartFormula - mzdev: 0.0005 mSigma: 3.39, , Analyte List - Shakuyaku_Add_Clust181106 (1)	[M-H]-	2020	110381	[]	TRUE	Paeoniflorin+CH2O	1.032	Shakuyaku_Add_Clust181106 (1)	0	0	0	122127	126662	110381	91108	74940	71527	163639	164904	164109	107215	115072	213168	80734	57959	60208	161343	141008	131500
229.986	230.993	13.97		-0.401	24.9		TRUE	C7H6NO6P	SmartFormula - mzdev: -0.0004 mSigma: 24.85,	[M-H]-	2010	0	[]	TRUE		-1.743		0	0	121366	117884	0	0	109525	0	0	0	0	0	0	0	85167	0	0	0	0	92657	70971
525.278	526.285	2.61		0.201	13.5		TRUE	C19H30N18O	SmartFormula - mzdev: 0.0002 mSigma: 13.55,	[M-H]-	2020	0	[]	FALSE		0.383		0	0	0	117875	120356	109435	0	0	0	0	0	0	0	114449	0	166778	147610	150027	0	0	72266
314.064	315.071	2.29		-0.227	23.8		TRUE	C12H9N7O4	SmartFormula - mzdev: -0.0002 mSigma: 23.84,	[M-H]-	2010	63527	[]	TRUE		-0.722		0	0	0	117792	126361	105488	66428	53443	56378	84040	75111	73581	92638	104413	136374	53796	23273	44228	61045	57102	63527
387.242	388.249	2.21					TRUE			[M-H]-		108554	[]	FALSE				0	0	0	115051	118374	111628	115452	105147	106548	108554	107667	111803	113921	114760	128956	113618	101416	102998	110094	103299	105127
341.431	684.877	2.19					TRUE			[M-H-H]2-		95563	[]	FALSE				0	0	0	113923	116475	99605	98909	83042	83096	96521	95563	100617	107785	103716	135990	92058	84196	80582	100274	82995	93266
341.431	342.438	2.2					TRUE			[M-H]-		95563	[]	FALSE				0	0	0	113923	116475	99605	98909	83042	83096	96521	95563	100617	107785	103716	135990	92058	84196	80582	100274	82995	93266
448.063	467.082	2.29		-0.17	13.3		TRUE	C16H5N17O2	SmartFormula - mzdev: -0.0002 mSigma: 13.31,	[M-H-H2O]-, [M-H]-	2020	62869	[BLUE]	TRUE		-0.38		0	0	0	113728	111095	105289	55221	37010	41303	74473	68534	72828	78680	90102	78207	43161	4522	28823	62869	51444	65298
341.349	342.356	2.2					TRUE			[M-H]-		98002	[]	FALSE				0	0	0	111815	119335	99631	98002	83468	83208	98518	98248	103770	110246	105368	131455	92811	88898	79626	99482	84983	91593
341.349	684.713	2.2					TRUE			[M-H-H]2-		98002	[]	FALSE				0	0	0	111815	119335	99631	98002	83468	83208	98518	98248	103770	110246	105368	131455	92811	88898	79626	99482	84983	91593
140.011	141.019	2.26		1.223	∞		TRUE	C4H3N3O3	SmartFormula - mzdev: 0.0012 mSigma: Infinity,	[M-H]-	1000	71403	[]	FALSE		8.733		0	0	0	106384	95733	132914	85113	76945	84543	98509	69412	79542	71403	82358	106836	59362	16031	43956	47688	46247	65662
375.129	376.136	2.83		-0.459	5.1	0	TRUE	C16H24O10	SmartFormula - mzdev: -0.0005 mSigma: 5.11, , Analyte List - Shakuyaku_181114 (1)	[M-H]-	2020	113310	[]	TRUE	Desbenzoylpaeoniflorin	-1.224	Shakuyaku_181114 (1)	0	0	0	105166	113310	102216	157951	142171	135068	148266	134720	161415	94036	100382	138912	134063	113243	108686	134763	118540	106501
229.986	230.993	12.45		-0.242	17.9		TRUE	C7H6NO6P	SmartFormula - mzdev: -0.0002 mSigma: 17.94,	[M-H]-	2020	0	[]	FALSE		-1.051		0	144351	0	103531	0	0	0	0	0	0	0	0	0	0	0	0	0	0	0	0	0
387.369	388.377	2.2					TRUE			[M-H]-		82719	[]	FALSE				0	0	0	98292	99552	90584	86991	79262	67932	84887	82719	86555	94435	91212	113514	78373	73202	71807	84333	73968	81730
355.104	356.111	2.83		0.415	19.7		TRUE	C16H20O9	SmartFormula - mzdev: 0.0004 mSigma: 19.66,	[M-H]-	2020	101683	[]	FALSE		1.17		0	0	0	95381	104398	95068	138133	126170	111412	126992	118799	140829	81270	90516	125021	111324	94974	89636	114887	101683	90552
485.282	486.29	7.71		-0.148	8		TRUE	C29H43O4P	SmartFormula - mzdev: -0.0001 mSigma: 8.01,	[M-H]-	2020	79664	[]	TRUE		-0.305		116886	111412	92658	94955	97848	69370	78033	68170	61313	86576	96226	79664	72939	75560	98325	85878	56564	58954	83346	78548	71717
485.282	486.29	7.78		-0.259	12.5		TRUE	C29H43O4P	SmartFormula - mzdev: -0.0003 mSigma: 12.49,	[M-H]-	2020	78548	[]	TRUE		-0.534		116886	111412	92658	94955	97848	69370	78033	68170	61313	86576	96226	79664	72939	75560	0	85878	56564	58954	83346	78548	71717
525.311	526.318	2.83		-0.54	33.6		TRUE	C25H52O7P2	SmartFormula - mzdev: -0.0005 mSigma: 33.58,	[M-H]-	2010	99549	[]	FALSE		-1.028		0	0	0	94953	98780	90987	119342	114618	110129	111581	106892	114354	90030	90748	114346	110461	105665	0	103794	99549	93342
578.141	579.149	2.28			∞		TRUE	C28H25N3O11	SmartFormula - mzdev: Infinity mSigma: Infinity, , MetFrag	[M-H]-, [M-H-H2O]-	MANUAL	81383	[RED]	TRUE				0	0	0	93035	97774	97517	361640	333902	339146	15134	14427	11771	79126	81383	86547	333900	114661	299174	11676	12603	11499
451.125	452.132	2.28		0.338	11.5	0	TRUE	C21H24O11	SmartFormula - mzdev: 0.0003 mSigma: 6.05, , Analyte List - Shakuyaku_181114 (1)	[M-H]-	2020	84223	[RED]	TRUE	Catechin-3-O-beta-D-glucopyranoside	0.749	Shakuyaku_181114 (1)	0	0	0	91954	84223	94050	435113	399071	397544	9491	9909	10928	87189	81704	105739	415178	271638	380705	10209	9140	9660
229.986	230.993	2.03		-0.363	22.5		TRUE	C7H6NO6P	SmartFormula - mzdev: -0.0004 mSigma: 22.50,	[M-H]-	2010	73158	[]	TRUE		-1.578		0	0	76169	91401	0	0	90858	103309	93539	97534	73158	89842	0	0	91355	86764	0	59160	0	98037	0
121.03	122.037	2.83					TRUE			[M-H]-		93157	[]	FALSE				5149	5561	4737	91070	95470	84315	145211	136019	103706	121142	109137	148781	74326	80563	119408	109245	90636	84334	100052	93157	87190
275.02	276.027	2.24		0.147	47.2		TRUE	C13H8O7	SmartFormula - mzdev: 0.0001 mSigma: 47.18,	[M-H]-	2010	65179	[RED]	TRUE		0.534		0	0	0	91069	83609	85536	164880	128331	131871	19767	16202	16036	66124	65179	103869	126907	20947	92908	11814	11886	14425
491.141	446.143	2.76		0.39	1.7	0	TRUE	C19H26O12	SmartFormula - mzdev: 0.0004 mSigma: 1.75, , Analyte List - Shakuyaku_181114 (1)	[M+HCOO]-, [M-H]-	2020	78340	[]	TRUE	Paeonovicinoside / 1'-O-benzoylsucrose	0.793	Shakuyaku_181114 (1)	0	0	0	90977	93156	78340	83171	73309	70614	94152	86030	96589	81887	81255	129107	71985	61422	60470	90214	74590	69095
261.04	262.048	2.21		0.018	∞		TRUE	C13H10O6	SmartFormula - mzdev: 0.0000 mSigma: Infinity,	[M-H]-	2000	70006	[BLUE]	FALSE		0.069		0	0	0	88655	94402	88177	49638	37304	37174	111977	82853	87493	70259	70759	102430	39545	10884	28162	70006	63661	74132
525.311	526.318	2.62		0.801	30.3		TRUE	C17H46N6O12	SmartFormula - mzdev: 0.0008 mSigma: 30.27,	[M-H]-	2010	0	[]	FALSE		1.524		0	0	0	86629	91217	79449	0	0	0	0	0	0	0	82417	0	0	0	106036	0	0	55551
331.067	332.074	2.88		0.086	2	0	TRUE	C13H16O10	SmartFormula - mzdev: 0.0001 mSigma: 2.02, , Analyte List - Shakuyaku_181114 (1)	[M-H]-	2020	54933	[BLUE]	TRUE	beta-Glucogallin	0.259	Shakuyaku_181114 (1)	0	0	0	85465	96661	78318	14765	6916	5325	153492	116853	107958	54933	54267	199993	5304	0	2803	100670	83613	80005
169.087	170.094	2.62		0.133	3.3		TRUE	C9H14O3	SmartFormula - mzdev: 0.0001 mSigma: 3.33,	[M-H]-	2020	79398	[RED]	FALSE		0.789		0	0	0	83316	79563	84871	190089	180527	178245	79398	41201	60393	52613	56995	143416	111860	91028	97613	34937	33623	37639
549.167	504.169	2.21		0.181	1.8	0	TRUE	C18H32O16	Analyte List - arabidopsis180517, SmartFormula - mzdev: 0.0002 mSigma: 1.76,	[M+HCOO]-, [M-H]-	2020	81675	[]	TRUE	Raffinose	0.33	arabidopsis180517	0	0	0	80782	80643	86691	81675	79316	81892	177233	186498	181804	83053	80583	104114	76772	48530	66869	194942	178442	159422
229.986	230.993	14.56		-0.435	20.7		TRUE	C7H6NO6P	SmartFormula - mzdev: -0.0004 mSigma: 20.67,	[M-H]-	2010	0	[]	TRUE		-1.891		0	108456	120444	79607	0	0	0	0	0	81041	73927	0	0	0	0	0	0	0	74179	0	0
229.986	230.993	14.38		-0.36	20.7		TRUE	C7H6NO6P	SmartFormula - mzdev: -0.0004 mSigma: 20.68,	[M-H]-	2010	0	[]	TRUE		-1.567		0	108044	0	78725	112653	0	100813	0	61532	70703	0	88028	88110	93716	0	0	0	95275	0	0	0
343.067	344.075	2.28		0.505	6.6		TRUE	C14H16O10	SmartFormula - mzdev: 0.0005 mSigma: 6.64,	[M-H]-	2020	34218	[]	FALSE		1.472		0	0	0	77401	71217	67133	44994	38506	38556	14664	13795	14033	61372	65139	73098	38816	17895	34218	12965	11867	12488
407.156	408.163	2.35		0.067	5.1	0	TRUE	C17H28O11	SmartFormula - mzdev: 0.0001 mSigma: 5.06, , Analyte List - Shakuyaku_Add_Clust181106 (1)	[M-H]-	2020	45205	[]	TRUE	6-O-beta-D-glucopyranosyllactinolide+HCOOH	0.164	Shakuyaku_Add_Clust181106 (1)	0	0	0	76550	70171	73758	56426	47222	45205	17781	19480	19926	66093	67072	94136	54303	44997	51399	20304	16350	17392
229.986	230.993	4.91		-0.349	20.3		TRUE	C7H6NO6P	SmartFormula - mzdev: -0.0003 mSigma: 20.33,	[M-H]-	2010	0	[]	TRUE		-1.517		93798	0	0	76523	61562	66920	68071	0	52070	0	0	0	0	61324	0	0	0	0	0	0	0
229.986	230.993	5.01		-0.169	21.7		TRUE	C7H6NO6P	SmartFormula - mzdev: -0.0002 mSigma: 21.72,	[M-H]-	2010	52485	[]	TRUE		-0.734		93798	69178	0	76523	61562	66920	68071	0	52485	0	57957	0	0	61324	0	70081	0	0	71787	0	0
139.004	140.011	2.26		0.021	∞		TRUE	C6H4O4	SmartFormula - mzdev: 0.0000 mSigma: Infinity,	[M-H]-	2000	53110	[]	FALSE		0.151		2550	2350	745	76134	69032	88086	70069	62164	69501	79192	53110	58907	50682	52743	82718	47642	31983	36025	38054	37261	54606
211.025	212.032	2.2		0.048	9.9		TRUE	C9H8O6	SmartFormula - mzdev: 0.0000 mSigma: 9.88,	[M-H]-	2020	54704	[]	FALSE		0.229		0	0	0	75883	76149	74546	46528	39735	40944	101626	62535	77572	54704	54712	84986	34821	15585	27117	60623	52387	72868
229.986	230.993	5.56		-0.345	23.6		TRUE	C7H6NO6P	SmartFormula - mzdev: -0.0003 mSigma: 23.65,	[M-H]-	2010	0	[]	TRUE		-1.498		0	61354	0	75305	0	0	0	0	51216	0	50741	67279	0	0	0	0	0	0	0	0	55454
229.986	230.993	14.94		-0.438	20.1		TRUE	C7H6NO6P	SmartFormula - mzdev: -0.0004 mSigma: 20.12,	[M-H]-	2010	0	[]	TRUE		-1.906		115653	0	83760	75014	84771	0	0	0	0	59034	0	0	0	0	89051	0	0	0	68473	0	0
193.014	194.022	2.18		-0.019	8.6		TRUE	C9H6O5	SmartFormula - mzdev: -0.0000 mSigma: 8.65,	[M-H]-	2020	48877	[]	TRUE		-0.097		0	0	0	73941	81311	82683	52750	46707	43678	97985	51327	83791	48877	47563	73755	43187	15616	27254	52099	45822	71542
229.986	230.993	3.78		-0.268	21.5		TRUE	C7H6NO6P	SmartFormula - mzdev: -0.0003 mSigma: 21.54,	[M-H]-	2010	69531	[]	TRUE		-1.166		86959	0	79857	71519	0	79629	0	0	0	0	55520	73840	69531	70306	76573	0	86341	76103	70612	0	66324
341.493	342.5	2.2					TRUE			[M-H]-		61816	[]	FALSE				0	0	0	71165	76558	67820	65390	57307	56336	68840	58956	71948	75818	74811	101322	60760	55269	52839	67917	53079	61816
341.493	1027.5	2.2					TRUE			[M-H-H2]3-		61816	[]	FALSE				0	0	0	71165	76558	67820	65390	57307	56336	68840	58956	71948	75818	74811	101322	60760	55269	52839	67917	53079	61816
229.986	230.993	5.1		-0.25	18.1		TRUE	C7H6NO6P	SmartFormula - mzdev: -0.0003 mSigma: 18.07,	[M-H]-	2020	0	[]	TRUE		-1.088		0	69178	0	71161	0	0	0	57814	52485	0	57957	0	0	65057	0	70081	75849	0	71787	0	56873
229.986	230.993	5.17		-0.478	22.4		TRUE	C7H6NO6P	SmartFormula - mzdev: -0.0005 mSigma: 22.38,	[M-H]-	2010	0	[]	TRUE		-2.077		0	0	0	71161	0	0	0	57814	52485	0	0	0	0	65057	0	0	75849	75498	71787	0	56873
341.197	342.204	7.69		0.13	1.1		TRUE	C18H30O6	SmartFormula - mzdev: 0.0001 mSigma: 1.08,	[M-H]-	2020	62504	[]	TRUE		0.381		68149	61491	57260	70179	75473	60826	50064	63304	53377	58132	66914	67532	60408	70625	62579	61584	74142	57540	62504	62471	70774
477.141	478.148	2.84		0.224	26.8		TRUE	C18H23N8O6P	SmartFormula - mzdev: 0.0002 mSigma: 26.84,	[M-H]-	2010	77624	[]	FALSE		0.469		0	0	0	68463	68929	65703	91110	86262	82470	103673	98169	111227	68321	66443	92528	90897	72819	73515	96481	85524	77624
278.042	279.049	2.24		0.189	∞		TRUE	C11H9N3O6	SmartFormula - mzdev: 0.0002 mSigma: Infinity,	[M-H]-	2000	41598	[]	TRUE		0.679		0	0	0	67617	64921	62344	27839	23087	21172	69667	55763	53757	41050	44591	71077	20380	4810	13777	41598	44163	46538
271.047	272.054	2.3		0.635	13.5		TRUE	C11H12O8	SmartFormula - mzdev: 0.0006 mSigma: 13.51,	[M-H]-	2020	49094	[]	FALSE		2.343		0	0	0	67518	66138	54324	181722	151578	0	55984	46805	48229	49094	57343	71850	0	81519	121278	38819	37540	40424
229.985	230.993	9.64		-0.533	24.2		TRUE	C7H6NO6P	SmartFormula - mzdev: -0.0005 mSigma: 24.19,	[M-H]-	2010	0	[]	TRUE		-2.317		84561	0	0	64038	0	50760	0	0	0	0	0	0	0	60568	0	67504	0	0	0	0	0
279.051	280.058	2.23		-0.253	19.9		TRUE	C13H12O7	SmartFormula - mzdev: -0.0003 mSigma: 19.94,	[M-H]-	2020	38355	[]	TRUE		-0.906		0	0	0	63229	59195	51594	54349	37058	38355	48905	33818	42583	43057	44337	69128	43894	8405	28211	34417	29562	35234
389.146	390.153	2.4		0.425	15.3		TRUE	C15H14N14	SmartFormula - mzdev: 0.0004 mSigma: 15.35,	[M-H]-	2020	58076	[]	FALSE		1.092		0	0	0	62607	63811	61771	80621	61666	60239	24079	21566	21847	60196	54233	89442	73233	58076	60937	25094	19772	17208
389.146	390.153	2.45		0.364	17.6		TRUE	C15H14N14	SmartFormula - mzdev: 0.0004 mSigma: 17.64,	[M-H]-	2020	58076	[]	FALSE		0.935		0	0	0	62607	63811	61771	80621	61666	60239	24079	21566	21847	60196	54233	89442	73233	58076	60937	25094	19772	17208
441.082	442.09	2.26		-0.492	7	0	TRUE	C22H18O10	SmartFormula - mzdev: -0.0005 mSigma: 6.98, , Analyte List - Shakuyaku_181114 (1), MetFrag	[M-H]-	2020	57060	[RED]	TRUE	Catechin-7-O-gallate / Epicatechin-7-O-gallate	-1.116	Shakuyaku_181114 (1)	0	0	0	61775	60677	66069	159360	119549	137106	14657	15234	16693	57841	57060	66484	151710	33811	123602	14220	12093	13671
241.036	242.043	2.32		0.3	12.4		TRUE	C10H10O7	SmartFormula - mzdev: 0.0003 mSigma: 12.36,	[M-H]-	2020	30971	[]	TRUE		1.246		0	0	0	61692	60416	62067	32701	30311	29114	47915	34964	41283	43864	51349	73185	24817	11455	21244	29257	24616	30971
431.062	432.07	2.26		0.643	28.1		TRUE	C33H8N2	SmartFormula - mzdev: 0.0006 mSigma: 28.15,	[M-H]-	2010	41966	[]	FALSE		1.492		0	0	0	61498	58296	59662	16623	24025	5348	54697	50653	56781	49123	51452	41966	14828	8072	22319	45524	36392	47983
229.986	230.993	5.46		-0.461	16.8		TRUE	C7H6NO6P	SmartFormula - mzdev: -0.0005 mSigma: 16.81,	[M-H]-	2020	0	[]	TRUE		-2.002		102732	61354	0	61219	0	0	0	0	0	0	50741	67279	0	0	70035	0	0	0	0	0	0
525.679	526.687	2.83					TRUE			[M-H]-		61026	[]	FALSE				0	0	0	61026	64517	59402	0	117382	0	94054	85817	113361	57539	66759	107906	0	0	0	90189	81833	70823
229.986	230.993	5.88		-0.385	23.7		TRUE	C7H6NO6P	SmartFormula - mzdev: -0.0004 mSigma: 23.70,	[M-H]-	2010	0	[]	TRUE		-1.673		0	0	0	59083	0	70688	49808	54639	0	0	0	60636	0	0	0	0	0	0	73216	0	0
421.136	422.143	2.62		0.442	1.3	0	TRUE	C17H26O12	SmartFormula - mzdev: 0.0004 mSigma: 1.33, , Analyte List - Shakuyaku_Add_Clust181106 (1)	[M-H]-	2020	48175	[RED]	FALSE	Desbenzoylpaeoniflorin+HCOOH	1.049	Shakuyaku_Add_Clust181106 (1)	0	0	0	58962	62933	54144	131137	103519	102679	42706	38572	38749	42352	48175	93539	101713	76494	81977	33975	31248	28109
124.017	125.024	2.27		1.303	∞		TRUE	C4H3N3O2	SmartFormula - mzdev: 0.0013 mSigma: Infinity,	[M-H]-	1000	44978	[]	FALSE		10.508		1956	2124	1786	58290	56772	67440	53889	51600	48765	62644	44978	49603	38861	44232	66004	35065	21067	28975	31599	30792	47478
168.007	169.014	2.88					TRUE			[M-H]-		34690	[BLUE]	FALSE				0	0	0	58159	52766	49055	0	0	0	86685	63237	77666	32039	34690	112047	0	8984	0	54162	42093	45400
492.128	493.135	2.92		-0.73	11.8		TRUE	C23H15N11O3	SmartFormula - mzdev: -0.0007 mSigma: 11.79,	[M-H]-	2020	39991	[BLUE]	FALSE		-1.483		0	0	0	58006	60874	49026	0	0	0	91609	73888	70408	39991	39499	122324	0	0	0	70305	59266	59699
445.136	446.143	2.79		0.486	5.2	0	TRUE	C19H26O12	SmartFormula - mzdev: 0.0005 mSigma: 5.23, , Analyte List - Shakuyaku_181114 (1)	[M-H]-	2020	48721	[]	TRUE	Paeonovicinoside / 1'-O-benzoylsucrose	1.092	Shakuyaku_181114 (1)	0	0	0	56389	54572	48721	48838	42785	40838	53830	52896	62102	50109	51562	74834	43014	37644	34353	52335	45712	41132
483.079	484.086	2.3		0.462	8.6		TRUE	C26H12N8OS	SmartFormula - mzdev: 0.0005 mSigma: 8.58,	[M-H]-	2020	39478	[]	FALSE		0.957		0	0	0	55733	52144	52052	61144	51197	48233	10387	10290	10945	39478	41967	39792	51925	7400	43023	9584	8800	7887
349.095	350.103	2.36		-0.567	22.6		TRUE	C16H19N2O5P	SmartFormula - mzdev: -0.0006 mSigma: 22.55,	[M-H]-	2010	45596	[]	FALSE		-1.624		0	0	0	55582	55051	53026	40959	35736	32871	55646	54413	46652	54678	57173	82539	37017	34919	31945	45596	49651	37433
173.104	174.112	2.12		-0.022	7.2	0	TRUE	C6H14N4O2	Analyte List - arabidopsis180517, Spectral Library - Bruker MetaboBASE Personal Library, SmartFormula - mzdev: -0.0000 mSigma: 7.17,	[M-H]-	2020	169547	[]	TRUE	L-Arginine	-0.13	arabidopsis180517	0	0	0	53951	58137	46248	285942	278140	237620	606689	547577	516060	37044	38997	56858	231690	145717	169547	385957	335155	466678
525.679	526.687	2.62					TRUE			[M-H]-		46027	[RED]	FALSE				0	0	0	53812	59490	46027	128897	113542	114832	30921	0	0	49943	58106	0	114035	96738	102755	0	23783	20441
161.024	162.032	2.24		0.086	∞		TRUE	C9H6O3	SmartFormula - mzdev: 0.0001 mSigma: Infinity,	[M-H]-	2000	41997	[RED]	FALSE		0.533		835	0	0	52846	51196	51306	196501	181812	176761	15389	10955	12260	40425	41997	63255	148678	81741	136388	10503	9058	12151
525.458	526.466	2.82					TRUE			[M-H]-		53227	[]	FALSE				0	0	0	52819	61482	53227	0	102393	0	86570	79575	99336	57600	51717	91892	0	0	0	77560	69863	59919
387.523	388.531	2.2					TRUE			[M-H]-		44665	[]	FALSE				0	0	0	52469	57033	47219	44665	35510	37046	50357	50606	54421	51458	51242	73570	41768	35872	33767	48830	38766	42714
329.123	330.13	2.84		-0.052	8.9		TRUE	C12H14N10O2	SmartFormula - mzdev: -0.0001 mSigma: 8.95,	[M-H]-	2020	59309	[]	FALSE		-0.157		0	0	0	52463	59309	52272	83301	70835	68142	75096	69110	80374	48299	51540	71922	66634	57696	57681	71247	64126	57637
629.188	630.195	3.97		-0.006	0.4	0	TRUE	C31H34O14	Analyte List - Shakuyaku_Add_Clust181106 (1), SmartFormula - mzdev: -0.0000 mSigma: 0.43,	[M-H]-	2020	51519	[]	TRUE	Benzoylpaeoniflorin+HCOOH	-0.01	Shakuyaku_Add_Clust181106 (1)	0	0	0	51519	49555	38257	78705	53167	0	125078	108104	107796	35420	34184	136205	61689	0	39740	116491	115259	90711
629.188	630.195	4.06		0.076	4	0	TRUE	C31H34O14	Analyte List - Shakuyaku_Add_Clust181106 (1), SmartFormula - mzdev: 0.0001 mSigma: 3.99,	[M-H]-	2020	49555	[]	TRUE	Benzoylpaeoniflorin+HCOOH	0.12	Shakuyaku_Add_Clust181106 (1)	0	0	0	51519	49555	38257	78705	53167	53447	0	0	107796	0	0	136205	61689	33269	39740	116491	115259	90711
493.234	494.241	2.26					TRUE			[M-H]-		35841	[]	FALSE				0	0	0	51215	56475	59185	5704	2474	4942	44817	46614	46430	60456	60065	68481	6424	0	3520	35841	37782	31920
162.032	163.039	2.16		-0.62	∞		TRUE	C5H10NO3P	SmartFormula - mzdev: -0.0006 mSigma: Infinity,	[M-H]-	2000	40187	[RED]	FALSE		-3.827		5913	5538	4630	50764	56783	54643	123721	123702	118547	18523	10276	15479	36142	40187	49383	101690	46229	62346	9811	10221	10759
262.048	263.055	2.23		-0.168	∞		TRUE	C12H13N3S2	SmartFormula - mzdev: -0.0002 mSigma: Infinity,	[M-H]-	2000	30265	[]	FALSE		-0.643		0	0	0	50347	46426	40185	29956	22202	22222	53079	42956	42753	32698	33499	52175	23141	0	15092	29973	30265	31571
271.061	272.068	2.21		-0.372	∞	0	TRUE	C15H12O5	SmartFormula - mzdev: 0.0003 mSigma: Infinity, , Analyte List - arabidopsis180517	[M-H]-	2000	40424	[]	FALSE	Naringenin	-1.373	arabidopsis180517	0	0	0	50087	56510	41506	181722	151578	141863	13703	11280	12774	36142	39708	57918	155734	81519	121278	38819	37540	40424
553.172	554.179	4.26		0.114	4.6		TRUE	C29H30O11	SmartFormula - mzdev: 0.0001 mSigma: 4.59,	[M-H]-, [M+HCOO]-	2020	37353	[]	TRUE		0.207		0	0	0	48069	42677	37759	0	17909	0	56139	57024	51775	37353	34543	77495	18153	0	14858	58111	52793	42148
465.214	466.221	6.67		0.071	15.8		TRUE	C16H40N2O9P2	SmartFormula - mzdev: 0.0001 mSigma: 15.80,	[M-H]-	2020	31773	[]	FALSE		0.152		65917	65890	63701	47501	46575	37745	31773	32451	29201	31909	30732	31630	29280	27295	29945	30757	32575	29024	31819	29686	29827
133.066	134.073	2.83		0.15	5.4		TRUE	C9H10O	SmartFormula - mzdev: 0.0001 mSigma: 5.43,	[M-H]-	2020	44316	[]	FALSE		1.125		0	0	0	47003	48527	44316	86669	76518	0	55196	46345	68434	31335	38736	58110	50948	43927	43794	45750	39018	35834
150.032	151.04	2.25		-0.286	∞		TRUE	C4H10NO3P	SmartFormula - mzdev: -0.0003 mSigma: Infinity,	[M-H]-	2000	34772	[RED]	FALSE		-1.907		872	0	0	46439	42775	50742	176922	178221	175552	15906	11538	13532	34772	33979	54677	120734	76233	105480	8811	7686	11430
150.032	151.04	2.22		-0.324	∞		TRUE	C4H10NO3P	SmartFormula - mzdev: -0.0003 mSigma: Infinity,	[M-H]-	2000	34772	[]	FALSE		-2.161		872	0	0	46439	42775	50742	176922	178221	175552	15906	11538	13532	34772	33979	54677	120734	76233	105480	8811	7686	11430
525.459	526.466	2.62					TRUE			[M-H]-		42962	[RED]	FALSE				0	0	0	46400	55736	42962	107251	96533	96300	33327	0	28352	49014	43008	0	96613	82950	84690	0	17850	14373
176.048	177.055	2.44		-0.214	∞		TRUE	C6H12NO3P	SmartFormula - mzdev: -0.0002 mSigma: Infinity,	[M-H]-	2000	31016	[]	TRUE		-1.215		0	0	1300	44936	42406	47845	78308	70280	67104	0	0	0	31016	35170	68264	48574	0	38327	23027	0	0
235.025	236.032	2.21		0.193	17.5		TRUE	C11H8O6	SmartFormula - mzdev: 0.0002 mSigma: 17.47,	[M-H]-	2020	31560	[]	FALSE		0.823		0	0	0	43830	46717	44681	25807	20035	20491	55350	37412	46142	34083	33349	50637	22177	6477	13160	31560	26081	36978
271.046	272.054	2.86		0.401	0.8		TRUE	C11H12O8	SmartFormula - mzdev: 0.0004 mSigma: 0.80,	[M-H]-	2020	29779	[]	TRUE		1.479		0	0	0	43531	48259	40316	0	0	0	80277	58269	53450	26864	29779	103723	0	20475	0	48170	38285	37479
192.043	193.05	2.85		-0.368	∞		TRUE	C6H12NO4P	SmartFormula - mzdev: -0.0004 mSigma: Infinity,	[M-H]-, [M-H-H2O]-	2000	40328	[]	TRUE		-1.914		0	0	0	43377	44732	40142	78153	69866	41570	60133	46980	78052	30822	35584	49248	37727	34848	34283	41389	40328	34813
165.019	166.026	2.22			∞		TRUE	C8H6O4	MetFrag, SmartFormula - mzdev: -0.0001 mSigma: Infinity,	[M-H]-	MANUAL	35378	[RED]	TRUE	phthalic acid			8063	8431	6229	42972	42462	42187	167906	138676	139961	13410	11719	11748	30584	35378	54740	130325	70719	106466	7619	7689	9797
165.019	166.027	2.25		-0.051	∞		TRUE	C8H6O4	SmartFormula - mzdev: -0.0001 mSigma: Infinity,	[M-H]-	2000	35378	[]	FALSE		-0.306		8063	8431	6229	42972	42462	42187	167906	138676	139961	13410	11719	11748	30584	35378	54740	130325	70719	106466	7619	7689	9797
137.024	138.032	2.48			∞		TRUE	C7H6O3	CompoundCrawler	[M-H]-	MANUAL	37319	[RED]	FALSE	salicylic acid			3393	2824	2136	42761	39000	46540	131913	139209	128574	22335	14676	19040	29843	37319	70647	102240	65774	64551	14912	11719	10291
136.988	137.995	2.25		0.019	13.2		TRUE	C6H2O4	SmartFormula - mzdev: 0.0000 mSigma: 13.20,	[M-H]-	2020	34442	[]	FALSE		0.138		1379	0	1058	42192	39373	50230	36993	34442	35840	54537	34241	43739	30595	34560	50652	31219	12294	21972	29235	27625	35990
123.045	124.052	2.85		0.024	4.4	0	TRUE	C7H8O2	Analyte List - ecoli1805174, SmartFormula - mzdev: 0.0000 mSigma: 4.43,	[M-H]-	2020	44200	[]	FALSE	p-Hydroxybenzyl alcohol	0.192	ecoli1805174	0	0	0	41729	48458	40965	76995	67099	46068	59326	52692	73380	32395	35724	54656	46896	41238	35785	48623	44200	37755
163.04	164.047	2.85		0.019	∞	0	TRUE	C9H8O3	SmartFormula - mzdev: 0.0000 mSigma: Infinity, , Analyte List - arabidopsis180517	[M-H]-	2000	40029	[]	FALSE	p-Coumaric acid	0.114	arabidopsis180517	2149	0	1558	40116	43481	39313	74381	62178	41855	54352	42465	68845	27210	31919	49523	40537	36618	35539	40029	36457	33084
311.114	312.121	2.84		0.284	6.5		TRUE	C15H20O7	SmartFormula - mzdev: 0.0003 mSigma: 6.46,	[M-H]-	2020	42210	[]	FALSE		0.913		0	0	0	37499	42210	33150	55616	49414	46667	50784	47978	60300	32806	35797	49176	45484	41761	37008	49707	43664	40584
191.035	192.042	2.85		-0.073	∞	0	TRUE	C10H8O4	Analyte List - arabidopsis180517, SmartFormula - mzdev: -0.0001 mSigma: Infinity,	[M-H]-	2000	36945	[]	FALSE	Scopoletin	-0.383	arabidopsis180517	1033	1242	897	37391	38052	35506	61471	55902	38168	47505	38340	62641	26888	33026	41455	35126	30073	28838	38015	36945	31666
151.04	152.047	2.2		-0.214	6.4	0	TRUE	C8H8O3	SmartFormula - mzdev: -0.0002 mSigma: 6.45, , Analyte List - Shakuyaku_181114 (1)	[M-H]-	2020	28346	[RED]	FALSE	Resacetophenone / 3-methylsalicyric acid	-1.419	Shakuyaku_181114 (1)	0	744	0	35882	38008	39856	130365	137208	137992	14635	10597	13682	27464	28346	46883	113479	99049	85240	9157	8518	11929
437.109	438.117	2.86		0.494	1		TRUE	C20H22O11	SmartFormula - mzdev: 0.0005 mSigma: 1.00,	[M-H]-	2020	25925	[]	FALSE		1.13		0	0	0	35759	42031	29261	5193	2244	2684	66854	54040	47196	24655	25925	93285	2186	916	0	47326	40583	36360
190.027	191.034	2.84		-0.408	∞		TRUE	C6H10NO4P	SmartFormula - mzdev: -0.0004 mSigma: Infinity,	[M-H]-	2000	32656	[]	FALSE		-2.146		1864	1740	0	35461	37879	32656	66506	55079	36650	49511	38847	67952	23849	30114	40313	31370	31068	27080	34301	31795	29884
153.056	154.063	2.85		0.121	5.6	0	TRUE	C8H10O3	SmartFormula - mzdev: 0.0001 mSigma: 5.58, , Analyte List - HMDB_Plant_180619 (1)	[M-H]-, [M-H-H2O]-	2020	31247	[]	FALSE	Hydroxytyrosol	0.79	HMDB_Plant_180619 (1)	0	0	0	35347	34051	31247	67113	54437	32832	42539	36456	58509	21573	26680	38918	32342	27039	23982	28256	26009	24531
189.02	190.027	2.84		0.206	∞		TRUE	C10H6O4	SmartFormula - mzdev: 0.0002 mSigma: Infinity,	[M-H]-	2000	33232	[]	FALSE		1.091		1899	1797	1349	34481	33535	31302	59084	54478	33232	49172	38804	59337	25693	30806	39063	34424	30459	27757	36112	32395	32965
267.088	268.095	2.84		0.18	15		TRUE	C13H16O6	SmartFormula - mzdev: 0.0002 mSigma: 15.04,	[M-H]-	2020	35245	[]	FALSE		0.674		0	0	0	34411	39997	34560	56887	51375	39638	48215	42687	49433	26463	30392	45406	38376	31178	31522	35245	35570	30880
525.561	526.569	2.82					TRUE			[M-H]-		38579	[]	FALSE				0	0	0	33926	50838	38579	0	87128	0	68213	64941	80076	35402	37957	75984	0	60435	0	60927	54984	45596
525.562	1053.14	2.83					TRUE			[M-H-H]2-		38579	[]	FALSE				0	0	0	33926	50838	38579	0	87128	0	68213	64941	80076	35402	37957	75984	0	60435	0	60927	54984	45596
137.024	138.032	2.25		0.005	∞	0	TRUE	C7H6O3	SmartFormula - mzdev: 0.0000 mSigma: Infinity, , Analyte List - Shakuyaku_181114 (1)	[M-H]-	2000	28950	[RED]	FALSE	4-Hydroxybenzoic acid / Salicylic acid (O-Hydroxybenzoic acid)	0.034	Shakuyaku_181114 (1)	0	2466	2295	33344	34470	38753	126881	123185	126164	13827	11303	12807	26439	28950	43887	95221	61346	75712	9377	7946	12701
137.024	138.032	2.22		0.016	∞	0	TRUE	C7H6O3	SmartFormula - mzdev: 0.0000 mSigma: Infinity, , Analyte List - Shakuyaku_181114 (1)	[M-H]-	2000	28950	[]	FALSE	4-Hydroxybenzoic acid / Salicylic acid (O-Hydroxybenzoic acid)	0.115	Shakuyaku_181114 (1)	0	2466	2295	33344	34470	38753	126881	123185	126164	13827	11303	12807	26439	28950	43887	95221	61346	75712	9377	7946	12701
525.561	526.569	2.62					TRUE			[M-H]-		30924	[]	FALSE				0	0	0	31749	44419	30924	89699	81926	81591	22323	0	0	27431	30951	70285	80751	63890	67366	0	0	0
525.562	1053.14	2.62					TRUE			[M-H-H]2-		30924	[]	FALSE				0	0	0	31749	44419	30924	89699	81926	81591	22323	0	0	27431	30951	70285	80751	63890	67366	0	0	0
129.019	130.027	2.84		0.127	5.7		TRUE	C5H6O4	SmartFormula - mzdev: 0.0001 mSigma: 5.67,	[M-H]-	2020	31278	[]	FALSE		0.983		0	0	0	31278	31865	28955	68100	55281	34572	40760	33554	66611	20376	23740	39824	31360	28526	25474	31989	29344	25200
455.099	410.1	2.3		0.14	5.6		TRUE	C22H18O8	SmartFormula - mzdev: 0.0001 mSigma: 5.63,	[M+HCOO]-, [M-H]-	2020	25411	[RED]	FALSE		0.308		0	0	0	30940	30034	29669	111384	95963	95950	6275	6457	6891	23225	25411	27691	96261	34736	83340	5614	6092	5591
576.209	577.216	2.47		-0.28	1.3		TRUE	C19H23N21S	SmartFormula - mzdev: -0.0003 mSigma: 1.25,	[M-H]-	2020	28054	[]	FALSE		-0.485		0	0	0	29906	30873	25544	56483	56892	50040	14126	15008	13502	28578	28054	32768	58316	44066	43178	15633	12541	11086
150.068	151.075	2.85		0.238	∞		TRUE	C7H9N3O	SmartFormula - mzdev: 0.0002 mSigma: Infinity,	[M-H]-	2000	25911	[]	FALSE		1.588		0	0	0	28872	31849	25911	54197	43524	27529	36582	29889	52019	17018	23084	33516	27265	22911	21486	25355	22484	21008
526.366	527.373	2.81					TRUE			[M-H]-		30348	[]	FALSE				0	0	0	27634	30348	27154	0	72086	0	58810	44886	65906	25969	30933	66048	0	55747	0	55502	48371	41758
526.282	527.289	2.82					TRUE			[M-H]-		46785	[]	FALSE				0	0	0	27212	27541	26563	65906	65204	61437	57582	47359	61125	25596	30675	61142	60137	51969	0	53223	46785	40555
272.068	273.075	2.24			∞		TRUE	C14H7N7	SmartFormula - mzdev: -0.0008 mSigma: 11.92, , MetFrag	[M-H]-	MANUAL	20879	[RED]	TRUE	5-[5-(2-pyridyl)tetrazol-2-yl]isophthalonitrile			0	0	0	26174	24653	23727	96288	87947	78467	7743	6572	6527	18233	20879	29505	76756	47154	67011	5315	5509	6252
449.254	450.261	2.84					TRUE			[M-H]-		33253	[]	FALSE				0	0	0	25631	32205	23843	54854	48988	46329	55345	49354	61448	20647	21852	47482	47606	32463	33065	49884	41592	33253
197.082	198.089	2.62		0.071	8.8	0	TRUE	C10H14O4	Analyte List - Shakuyaku_181114 (1), SmartFormula - mzdev: 0.0001 mSigma: 8.80,	[M-H]-	2020	24529	[]	FALSE	(-)-Paeonilactone A	0.359	Shakuyaku_181114 (1)	0	0	0	24654	25643	26818	54956	51800	53155	24860	14056	17343	13486	16587	43947	33090	24529	25350	10627	10180	10437
525.638	526.646	2.82					TRUE			[M-H]-		25565	[]	FALSE				0	0	0	24453	24347	23986	0	58667	52201	39417	35076	51781	22923	25565	51983	0	43995	0	44088	37581	32561
177.042	178.049	2.73					TRUE			[M-H]-		19642	[]	FALSE				0	1339	0	24118	0	460679	53527	54780	55271	0	19642	21666	361560	14125	0	29163	24430	32650	14430	12877	0
243.03	244.037	2.21		0.065	14.3		TRUE	C13H8O5	SmartFormula - mzdev: 0.0001 mSigma: 14.25,	[M-H]-	2020	16474	[]	FALSE		0.266		0	0	0	24019	18635	20900	97300	83430	85238	7122	6155	6020	14409	16474	25749	78783	43155	58175	4469	3645	4370
164.011	165.019	2.25		-0.447	∞		TRUE	C4H8NO4P	SmartFormula - mzdev: -0.0004 mSigma: Infinity,	[M-H]-	2000	20472	[]	FALSE		-2.723		808	0	0	23615	22392	24713	77858	69922	75600	11104	9130	9288	16566	20472	28301	59004	34266	45277	6100	6626	7896
330.074	331.081	2.24		-0.029	∞		TRUE	C7H19N5O6P2	SmartFormula - mzdev: -0.0000 mSigma: Infinity,	[M-H]-	2000	17847	[]	FALSE		-0.087		0	0	0	22537	22019	19629	62372	49460	51613	4408	5014	4737	17718	17847	23450	51135	19440	42970	4229	4975	4596
525.638	526.646	2.62					TRUE			[M-H]-		18789	[]	FALSE				0	0	0	22452	23090	18789	62762	53329	57432	17286	0	12728	18889	21842	0	55433	45616	49666	0	0	10183
131.083	132.09	2.13		-0.015	5	0	TRUE	C5H12N2O2	SmartFormula - mzdev: -0.0000 mSigma: 4.97, , Analyte List - Shakuyaku_181114 (1)	[M-H]-	2020	61345	[]	FALSE	Ornithine	-0.114	Shakuyaku_181114 (1)	0	0	0	22028	22472	17863	107904	104420	92265	235973	206814	201495	14994	15150	21514	83767	56428	61345	154697	126404	176712
526.366	527.373	2.62					TRUE			[M-H]-		19872	[]	FALSE				0	0	0	21869	26136	18552	72611	67735	69434	16982	0	10191	19872	23911	60406	68481	55819	60840	0	0	9089
167.035	168.042	2.24		-0.221	7	0	TRUE	C8H8O4	SmartFormula - mzdev: -0.0002 mSigma: 7.04, , Analyte List - Shakuyaku_181114 (1)	[M-H]-	2020	17322	[]	FALSE	Vanillic acid	-1.326	Shakuyaku_181114 (1)	0	0	0	21621	18906	21146	77398	65990	71818	8792	7318	7352	14440	17322	26669	55832	38493	49954	5012	5675	7275
491.214	492.221	4.68			∞		TRUE	C22H36O12	MetFrag, SmartFormula - mzdev: 0.0004 mSigma: 12.96,	[M-H]-	MANUAL	16024	[RED]	TRUE	(2~{S},3~{S},4~{S},5~{R},6~{R})-3,4-dihydroxy-6-(7-methyl-3-methylene-oct-6-enoxy)-5-[(2~{S},3~{R},4~{S},5~{S},6~{R})-3,4,5-trihydroxy-6-methylol-tetrahydropyran-2-yl]oxy-tetrahydropyran-2-carboxylic acid			0	0	0	21319	21420	16024	107557	85253	86472	0	0	0	15308	17280	48461	92204	58842	75827	0	0	0
491.213	492.221	4.75		-0.303	13.6		TRUE	C22H36O12	SmartFormula - mzdev: -0.0003 mSigma: 13.59,	[M-H]-	2020	16024	[]	TRUE		-0.616		0	0	0	21319	21420	16024	107557	85253	86472	0	0	0	0	17280	48461	92204	58842	75827	0	0	0
507.151	508.158	3.32		0.313	28.8		TRUE	C22H16N14O2	SmartFormula - mzdev: 0.0003 mSigma: 28.78,	[M-H]-	2010	21555	[]	TRUE		0.616		0	0	0	20958	21237	20066	30406	22515	21534	75510	79167	75059	18827	22044	38821	0	20359	21555	71557	61740	59871
507.151	508.158	3.36		0.376	27.3		TRUE	C22H16N14O2	SmartFormula - mzdev: 0.0004 mSigma: 27.34,	[M-H]-	2010	21555	[]	TRUE		0.74		0	0	0	20958	21237	20066	30406	22515	21534	75510	79167	75059	18827	22044	38821	0	20359	21555	71557	61740	59871
163.04	164.047	2.19					TRUE			[M-H]-		16688	[]	FALSE				1986	828	1421	20798	22707	22728	62361	61037	60674	9845	7217	8990	15271	16688	23333	52113	38445	36953	6466	5418	6746
303.051	304.058	2.24		0.171	26.6	0	TRUE	C15H12O7	Analyte List - arabidopsis180517, SmartFormula - mzdev: 0.0002 mSigma: 26.63,	[M-H]-	2010	17945	[]	FALSE	Dihydroquercetin	0.564	arabidopsis180517	0	0	0	20564	20823	20143	82424	63316	61610	7231	6571	7108	17945	17375	27232	68581	30839	57998	5709	5561	5599
477.068	478.076	2.58		0.116	15.7		TRUE	C14H18N6O11S	SmartFormula - mzdev: 0.0001 mSigma: 15.74,	[M-H]-	2020	13732	[]	FALSE		0.243		0	0	0	18717	18170	13114	60962	44415	39627	0	0	0	14194	13732	55164	45404	21893	29400	0	0	0
166.027	167.034	2.26		-0.805	∞		TRUE	C4H10NO4P	SmartFormula - mzdev: -0.0008 mSigma: Infinity,	[M-H]-	2000	13797	[]	FALSE		-4.85		0	990	0	18394	19011	20541	60606	61441	59418	7175	6341	5892	13370	13797	21222	44308	24273	37586	4001	4756	5527
150.032	151.039	2.48			∞		TRUE	C4H10NO3P	SmartFormula - mzdev: Infinity mSigma: Infinity,	[M-H]-	MANUAL	13297	[RED]	FALSE				0	0	0	18383	16382	20026	103922	100393	92107	9839	6344	7610	13297	13353	29379	64679	41380	0	5733	0	0
441.083	442.091	2.53		0.511	5.1	0	TRUE	C22H18O10	SmartFormula - mzdev: 0.0005 mSigma: 5.05, , Spectral Library - MetaboBASE Plant Library, Analyte List - Shakuyaku_181114 (1)	[M-H]-	2020	14322	[RED]	TRUE	Catechin-7-O-gallate / Epicatechin-7-O-gallate	1.158	Shakuyaku_181114 (1)	0	0	0	18015	18703	14322	147088	94113	93200	7621	7847	7451	15512	13430	75523	109556	40817	66461	7936	5264	5637
729.146	730.154	2.31		0.11	16.9		TRUE	C43H22N8O3S	SmartFormula - mzdev: 0.0001 mSigma: 16.89,	[M-H]-	2020	10433	[]	FALSE		0.15		0	0	0	18006	19434	18235	50606	44278	47541	3436	2433	3139	15744	16375	10433	51595	5798	35468	1882	0	2515
163.004	164.011	2.24		0.056	∞		TRUE	C8H4O4	SmartFormula - mzdev: 0.0001 mSigma: Infinity,	[M-H]-	2000	13707	[]	FALSE		0.342		2975	2863	2356	17681	16716	19470	55577	51532	50401	7804	6650	7514	12996	13707	22373	42948	27604	35105	4585	4659	5866
449.109	450.117	2.56		0.452	23.4		TRUE	C19H10N14O	SmartFormula - mzdev: 0.0005 mSigma: 23.43,	[M-H]-	2010	8397	[]	TRUE		1.007		0	0	0	11929	10637	7977	96900	76881	74375	2398	1943	1738	8397	8513	18399	84468	55648	66288	1885	1432	1599
163.004	164.011	2.49		0.234	∞		TRUE	C8H4O4	SmartFormula - mzdev: 0.0002 mSigma: Infinity,	[M-H]-	2000	9208	[]	FALSE		1.437		3029	2785	0	11524	10800	13452	50764	49874	52947	7294	5135	6636	8334	9208	18832	39864	25510	28919	4624	0	4220
593.152	594.159	2.55		0.653	7	0	TRUE	C27H30O15	MetFrag, SmartFormula - mzdev: 0.0007 mSigma: 7.02, , Analyte List - arabidopsis180517	[M-H]-	2020	6731	[RED]	TRUE	Kaempferol 3-galactoside-7-rhamnoside	1.102	arabidopsis180517	0	0	0	8150	8583	6731	109542	82078	81514	5013	3656	3074	6637	7220	20470	91373	45277	61961	3695	3268	2752
623.163	624.17	2.49		0.857	4.6		TRUE	C28H32O16	SmartFormula - mzdev: 0.0009 mSigma: 4.61,	[M-H]-	2020	3486	[]	TRUE		1.375		0	0	0	3943	4040	3118	85677	64304	66252	1675	1716	1448	3656	3486	7732	70594	36045	52685	1666	1019	1139
229.986	230.993	10.66		-0.453	24.4		TRUE	C7H6NO6P	SmartFormula - mzdev: -0.0005 mSigma: 24.37,	[M-H]-	2010	0	[]	TRUE		-1.968		0	64596	0	0	0	0	66235	0	0	0	0	0	0	59837	0	0	0	0	0	0	62775
277.145	278.152	14.15		0.129	3.6	0	TRUE	C16H22O4	Analyte List - HMDB_Plant_180619 (1), SmartFormula - mzdev: 0.0001 mSigma: 3.63,	[M-H]-	2020	2009	[]	FALSE	Dibutyl phthalate	0.465	HMDB_Plant_180619 (1)	234815	109164	0	0	41046	33771	0	19837	0	10201	0	6261	4441	3770	3383	0	2009	0	0	0	0
229.986	230.993	2.36		-0.24	18.7		TRUE	C7H6NO6P	SmartFormula - mzdev: -0.0002 mSigma: 18.69,	[M-H]-	2020	0	[]	TRUE		-1.044		0	0	99002	0	0	96457	0	0	0	0	0	0	68001	70385	0	0	0	68353	0	59121	70206
182.022	183.029	2.47					TRUE			[M-H]-, [M-H-H2O]-		0	[]	FALSE				0	0	0	0	0	0	41788	39712	39789	58656	0	50783	0	0	71563	28797	19460	0	35367	29217	0
229.986	230.993	2.54		-0.188	15.8		TRUE	C7H6NO6P	SmartFormula - mzdev: -0.0002 mSigma: 15.75,	[M-H]-	2020	0	[]	TRUE		-0.818		0	123428	80055	0	0	0	0	103938	0	0	69267	0	0	70385	80481	0	0	0	67284	0	0
525.162	480.164	2.62	-0.36	0.532	16.3	0	TRUE	C23H28O11	SmartFormula - mzdev: -0.0008 mSigma: 4.65, , Spectral Library - Bruker MetaboBASE Personal Library, Analyte List - Shakuyaku_181114 (1)	[M+HCOO]-, [M-H]-	2220	0	[]	TRUE	Albiflorin	1.013	Shakuyaku_181114 (1)	0	0	0	0	0	5732434	5849087	5849087	5849087	0	0	0	5666418	5777314	5848954	5849087	5828626	5846118	0	0	0
631.167	632.174	2.66		0.371	1.5	0	TRUE	C30H32O15	Analyte List - Shakuyaku_181114 (1), SmartFormula - mzdev: 0.0004 mSigma: 1.53,	[M-H]-	2020	0	[]	TRUE	Galloylpaeoniflorin / Galloylalbifrorin	0.587	Shakuyaku_181114 (1)	0	0	0	0	0	0	0	86216	95539	0	0	53596	0	0	0	101932	32582	56893	0	0	0
229.986	230.993	2.92		-0.282	20.5		TRUE	C7H6NO6P	SmartFormula - mzdev: -0.0003 mSigma: 20.47,	[M-H]-	2010	0	[]	FALSE		-1.225		0	0	100477	0	0	71958	0	0	0	52277	52045	0	0	0	0	0	0	0	0	52438	0
229.986	230.993	3.23		-0.307	19		TRUE	C7H6NO6P	SmartFormula - mzdev: -0.0003 mSigma: 19.03,	[M-H]-	2020	0	[]	TRUE		-1.334		0	0	0	0	70917	0	86076	0	0	0	62853	0	69354	65465	0	0	0	0	0	0	62812
229.986	230.993	4.01		-0.259	21.6		TRUE	C7H6NO6P	SmartFormula - mzdev: -0.0003 mSigma: 21.59,	[M-H]-	2010	0	[]	TRUE		-1.125		0	0	0	0	0	0	0	0	61138	63719	53764	68079	0	0	0	0	0	0	0	72240	61931
229.986	230.993	4.16		-0.228	22		TRUE	C7H6NO6P	SmartFormula - mzdev: -0.0002 mSigma: 21.99,	[M-H]-	2010	0	[]	TRUE		-0.993		0	0	0	0	69529	0	0	66689	0	0	0	68079	0	75216	80940	72303	0	73848	0	0	61931
229.986	230.993	4.22		-0.41	22.4		TRUE	C7H6NO6P	SmartFormula - mzdev: -0.0004 mSigma: 22.35,	[M-H]-	2010	0	[]	TRUE		-1.782		88197	0	66462	0	69529	0	0	66689	0	60094	0	0	0	75216	80940	72303	0	73848	0	0	0
229.986	230.993	4.32		-0.151	20		TRUE	C7H6NO6P	SmartFormula - mzdev: -0.0002 mSigma: 20.00,	[M-H]-	2020	0	[]	FALSE		-0.656		88197	0	66462	0	69529	0	0	0	0	60094	54199	0	0	75216	0	0	0	0	0	0	0
229.986	230.993	4.53		-0.449	20		TRUE	C7H6NO6P	SmartFormula - mzdev: -0.0004 mSigma: 20.01,	[M-H]-	2010	0	[]	FALSE		-1.951		99378	0	0	0	67749	0	0	0	0	0	59797	74864	0	0	0	0	0	0	0	0	0
229.986	230.993	4.71		-0.095	22.9		TRUE	C7H6NO6P	SmartFormula - mzdev: -0.0001 mSigma: 22.91,	[M-H]-	2010	0	[]	FALSE		-0.413		0	99121	0	0	67749	0	0	0	51698	56290	0	0	0	0	0	0	0	0	0	0	0
229.986	230.993	6.05		-0.383	19.6		TRUE	C7H6NO6P	SmartFormula - mzdev: -0.0004 mSigma: 19.58,	[M-H]-	2020	0	[]	TRUE		-1.666		0	0	0	0	65829	0	0	0	47325	0	52195	0	0	64686	65541	0	0	0	0	0	0
229.986	230.993	7.34		-0.299	21.7		TRUE	C7H6NO6P	SmartFormula - mzdev: -0.0003 mSigma: 21.70,	[M-H]-	2010	0	[]	FALSE		-1.3		0	0	62212	0	61530	0	0	47954	0	0	62445	0	0	0	64651	0	0	0	64753	65534	0
229.986	230.993	7.43		-0.42	20.9		TRUE	C7H6NO6P	SmartFormula - mzdev: -0.0004 mSigma: 20.93,	[M-H]-	2010	0	[]	TRUE		-1.825		0	57793	62212	0	61530	0	44091	47954	0	0	0	0	59972	0	64651	0	0	0	0	65534	0
229.985	230.993	8.02		-0.515	21.8		TRUE	C7H6NO6P	SmartFormula - mzdev: -0.0005 mSigma: 21.79,	[M-H]-	2010	0	[]	TRUE		-2.238		0	0	0	0	0	56185	49236	55390	0	0	0	0	0	60387	0	0	0	0	0	0	0
229.986	230.993	8.33		-0.364	19.6		TRUE	C7H6NO6P	SmartFormula - mzdev: -0.0004 mSigma: 19.56,	[M-H]-	2020	0	[]	TRUE		-1.581		0	0	63014	0	61832	0	0	0	0	52158	57210	55576	0	0	0	0	75992	0	0	0	0
229.986	230.993	8.88		-0.468	23.2		TRUE	C7H6NO6P	SmartFormula - mzdev: -0.0005 mSigma: 23.18,	[M-H]-	2010	0	[]	TRUE		-2.033		0	0	0	0	0	0	0	54624	0	0	0	54299	0	61703	0	0	0	0	0	0	62595
229.986	230.993	9.1		-0.497	25		TRUE	C7H6NO6P	SmartFormula - mzdev: -0.0005 mSigma: 24.98,	[M-H]-	2010	0	[]	TRUE		-2.159		0	0	0	0	0	0	0	0	0	56759	0	0	0	0	0	0	71375	0	0	64117	0
229.986	230.993	9.3		-0.496	23.9		TRUE	C7H6NO6P	SmartFormula - mzdev: -0.0005 mSigma: 23.87,	[M-H]-	2010	0	[]	TRUE		-2.157		0	0	0	0	0	57249	48336	0	45262	0	61237	0	0	0	0	0	0	67167	67951	0	0
229.986	230.993	10.09		-0.245	28.7		TRUE	C7H6NO6P	SmartFormula - mzdev: -0.0002 mSigma: 28.67,	[M-H]-	2010	0	[]	TRUE		-1.067		0	0	0	0	0	53137	0	0	0	57171	0	0	55766	0	0	67808	0	0	0	0	59330
229.986	230.993	10.14		-0.39	21.2		TRUE	C7H6NO6P	SmartFormula - mzdev: -0.0004 mSigma: 21.15,	[M-H]-	2010	0	[]	TRUE		-1.695		0	0	0	0	0	53137	0	0	0	57171	0	0	0	0	0	67808	0	0	0	0	59330
229.986	230.993	11.77		-0.314	22.8		TRUE	C7H6NO6P	SmartFormula - mzdev: -0.0003 mSigma: 22.78,	[M-H]-	2010	0	[]	TRUE		-1.363		124172	0	0	0	0	0	0	49984	0	0	0	0	0	0	65595	0	0	0	65659	0	0
229.986	230.993	12.08		-0.215	19.9		TRUE	C7H6NO6P	SmartFormula - mzdev: -0.0002 mSigma: 19.87,	[M-H]-	2020	0	[]	TRUE		-0.933		0	0	0	0	0	0	0	0	51855	0	0	0	58892	0	0	0	0	0	0	0	0
229.986	230.993	12.84		-0.484	22.5		TRUE	C7H6NO6P	SmartFormula - mzdev: -0.0005 mSigma: 22.48,	[M-H]-	2010	0	[]	TRUE		-2.103		0	0	0	0	0	0	74517	0	0	0	0	0	0	0	0	70352	0	0	0	74003	0
229.986	230.993	13.09		-0.321	28.2		TRUE	C7H6NO6P	SmartFormula - mzdev: -0.0003 mSigma: 28.23,	[M-H]-	2010	0	[]	TRUE		-1.394		0	0	0	0	0	0	0	0	0	51448	0	0	0	0	0	0	0	0	60905	63401	0
229.986	230.993	13.2		-0.301	20.4		TRUE	C7H6NO6P	SmartFormula - mzdev: -0.0003 mSigma: 20.40,	[M-H]-	2010	0	[]	TRUE		-1.31		0	139882	0	0	0	0	0	0	0	51448	0	0	0	0	0	0	0	66902	60905	0	0
229.985	230.993	13.35		-0.51	25.3		TRUE	C7H6NO6P	SmartFormula - mzdev: -0.0005 mSigma: 25.26,	[M-H]-	2010	0	[]	TRUE		-2.219		0	139882	0	0	0	0	0	0	0	0	0	0	0	0	74989	0	0	0	59041	0	0
229.986	230.993	13.58		-0.368	22		TRUE	C7H6NO6P	SmartFormula - mzdev: -0.0004 mSigma: 22.02,	[M-H]-	2010	0	[]	FALSE		-1.602		173704	0	0	0	0	0	0	63753	0	0	0	0	0	0	0	0	0	0	0	0	0
229.986	230.993	14.74		-0.427	18.5		TRUE	C7H6NO6P	SmartFormula - mzdev: -0.0004 mSigma: 18.47,	[M-H]-	2020	0	[]	FALSE		-1.856		0	73077	108308	0	83250	0	0	71751	78075	0	0	0	0	0	0	0	81905	0	70914	0	0

## Sheet: TableS3
Ogiso et al., A liquid chromatography-mass spectrometry method to study the interaction between membrane proteins and low-molecular-weight compound mixtures
Supplemental Material
Table S3. Key resource table
Key materials, chemicals and reagents, cell lines, instrumentation, software, and others used for experiments, were listed.
REAGENT or RESOURCE	SOURCE	IDENTIFIER
Lapatinib	Sigma-aldrich	Cat# SML2259
Oligomycin	Abcam	Cat# Ab141829
WZ811	Sigma-aldrich	Cat# SML0088
Atropin sulfate	Nacharai tesque	Cat# 03533-11
ATP gamma S	Cayman	Cat# 14957
Tiquidium Bromide	Toront Research	Cat# T445120
Lauryl Maltose Neopentyl Glycol	Anatrace Products	Cat# NG310
n-Dodecyl-b-D-maltoside	DOJIN	Cat# 341-06161
cOmplete Tablets	Roche	Cat# 04 693 159 001
FluoProdige Assay Kit	OZ biosciences	Cat# FPRO200
Trypsin Gold Mass Spectrometry Grade	Promega	Cat# V528A
Fetal Bovine Serum (FBS)	NICHIREI	Cat# 174012
Sodium dodecyl sulfate (SDS)	Nacharai tesque	Cat# 02873-62
Ammonium Formate	Nacharai tesque	Cat# 02509-55
Ammonium Bicarbonate	Fujifilm WAKO	Cat# 012-21745
Methanol	Kanto Chemicals	Cat# 25185-76
Acetonitrile	Kanto Chemicals	Cat# 01033-76
Formic acid	Fujifilm WAKO	Cat# 067-04531
HEPES	DOJIN	Cat# 346-01373
Ammonium hydroxide solution	Sigma-aldrich	Cat# 221228
DMEM	Nacharai tesque	Cat# 08456-65
RPMI1640	Nacharai tesque	Cat# 30264-85
Ham’s F12	Nacharai tesque	Cat# 17468-65
CELL BANKER2	Nippon Zenyaku Kogyo	Cat# CB031
Dulbecco’s Phosphate Buffered Saline (PBS)	Nacharai tesque	Cat# 14249-95
Penicillin-streptomycin mixed solution	Nacharai tesque	Cat# 09367-34
Trypsin Gold Mass Spectrometry Grade	Promega	Cat# V528A
Dithiothreitol (DTT)	Fujifilm WAKO	Cat# 048-29224
Iodoacetamide (IAA)	Fujifilm WAKO	Cat# 048-05591
Powdered peony	Takasago Yakugyo	Lot #060618
Powdered peony	Uchida Wakanyaku	Lot #9016429
A-431	JCRB	JCRB0004
MIA PaCa-2	JCRB	JCRB0070
CHO-K1	JCRB	JCRB9018
otofControl (v.4.1)	Bruker	N/A
Hyster (v.4.1)	Bruker	N/A
DataAnalysis (v.4.4SR1)	Bruker	N/A
MetaboScape (v.4.0)	Bruker	N/A
MASCOT (v.2.7)	Matrix Sciences	N/A
Inertsil WP300 Diol (100 x 2.1 mm, 5 mm)	GL Sciences	Cat# 5020-05914
Inertsil WP300 Diol guard column (10 x 1.5 mm, 5 mm)	GL Sciences	Cat# 5020-19181
Ultrafree-MC-HV	Millipore	Cat# UFC30HVNB
Amicon Ultra-0.5mL	Millipore	Cat# UFC501096
Zeba Spin Desalting Column 7K MWCO	Thermo	Cat# 89882
ESI-L Low Concentration Tuning Mix	Agilent	Cat# AGG1969-85000
APCI-L Low Concentration Tuning Mix	Agilent	Cat# AGG1969-85010
Bio-Beads SM-2	Bio-Rad	Cat# 152-3920
Unison UK-C18 (100 x 2 mm, 3 mm)	Imtakt	Cat# UK024
AQUITY UPLC BEH C 18 (1.0 x 100 mm, 1.7 µm)	Waters	Cat# 186002346
